# Supplementary material for: SNX3 drives maturation of Borrelia phagosomes by forming a hub for PI(3)P, Rab5a, and galectin-9
Source: PubMed Central journal article supplement — J Cell Biol. 2019 Jul 23;218(9):3039–59. doi: 10.1083/jcb.201812106 (PMC6719455; doi:10.1083/jcb.201812106), 2019-07-23
Supplement: JCB_201812106_TablesS1andS2.pdf [file JCB_201812106_TablesS1andS2.pdf]

**Table S1. Values for specified parameters following various treatments**

| <b>Accumulation of fluorophore-labeled SNX fusion constructs at internalized borreliae (Figure 1B)</b>     |                                                            |                                    |
|------------------------------------------------------------------------------------------------------------|------------------------------------------------------------|------------------------------------|
| <b>Overexpression of</b>                                                                                   | <b>Accumulation at internalized borreliae (Mean ± SEM)</b> |                                    |
| SNX1-GFP                                                                                                   | 48.33% ± 4.41%                                             |                                    |
| GFP-SNX3                                                                                                   | 73.33% ± 10.14%                                            |                                    |
| SNX4-GFP                                                                                                   | 11.67% ± 2.89%                                             |                                    |
| GFP-SNX8                                                                                                   | 20.00% ± 11.55%                                            |                                    |
| mCherry-SNX9                                                                                               | 3.33% ± 1.67%                                              |                                    |
| GFP-SNX12                                                                                                  | 5.00% ± 2.89%                                              |                                    |
| SNX17-GFP                                                                                                  | 16.67% ± 1.67%                                             |                                    |
| SNX27-GFP                                                                                                  | 1.67% ± 1.67%                                              |                                    |
| SNX31-GFP                                                                                                  | 11.67% ± 4.41%                                             |                                    |
| <b>Effect of double knockdown of SNX1 and SNX3 on the morphology of internalized borreliae (Figure 2B)</b> |                                                            |                                    |
| <b>siRNA target</b>                                                                                        | <b>Morphology of internalized borreliae</b>                | <b>Quantification (Mean ± SEM)</b> |
| Non-specific control                                                                                       | compacted                                                  | 70.40% ± 6.17%                     |
| SNX1 #1                                                                                                    |                                                            | 60.13% ± 10.35%                    |
| SNX3 #1                                                                                                    |                                                            | 27.67% ± 5.25%                     |
| SNX1 #1 + SNX3 #1                                                                                          |                                                            | 37.20% ± 6.18%                     |
| <b>Fluorescence intensity of DQ-BSA/borreliae phagosomes after SNX3 siRNA treatment (Figure 2I)</b>        |                                                            |                                    |
| <b>siRNA target</b>                                                                                        | <b>Quantification (Mean ± SEM)</b>                         |                                    |
| Non-specific control                                                                                       | 1311 a.u. ± 51.96 a.u.                                     |                                    |
| SNX3 #1                                                                                                    | 1058 a.u. ± 51.90 a.u.                                     |                                    |
| SNX3 #2                                                                                                    | 1135 a.u. ± 76.17 a.u.                                     |                                    |
| <b>Fluorescence intensity of DQ-BSA after SNX3 siRNA treatment (Figure 2J)</b>                             |                                                            |                                    |
| <b>siRNA target</b>                                                                                        | <b>Quantification (Mean ± SEM)</b>                         |                                    |
| Non-specific control                                                                                       | 1525 a.u. ± 17.18 a.u.                                     |                                    |
| SNX3 #1                                                                                                    | 1587 a.u. ± 23.89 a.u.                                     |                                    |
| SNX3 #2                                                                                                    | 1470 a.u. ± 17.11 a.u.                                     |                                    |

| survival assay after SNX3 knockdown - Bacteria number [ $10^4$ /ml] (Figure 2K)               |                                                |                                      |                                               |               |
|-----------------------------------------------------------------------------------------------|------------------------------------------------|--------------------------------------|-----------------------------------------------|---------------|
|                                                                                               | days                                           |                                      |                                               |               |
| siRNA target                                                                                  | 7                                              | 8                                    | 9                                             | 10            |
| Non-specific control                                                                          | 2.21 ± 0.20                                    | 3.27 ± 1.53                          | 11.93 ± 5.53                                  | 19.23 ± 6.69  |
| SNX3                                                                                          | 2.01 ± 0.89                                    | 5.38 ± 3.24                          | 18.04 ± 7.53                                  | 44.40 ± 13.41 |
| SNX1 expression level after SNX3 knockdown (Figure S3B)                                       |                                                |                                      |                                               |               |
| siRNA target                                                                                  | Quantification SNX1 protein level (Mean ± SEM) |                                      | Corresponding SNX3 protein level (Mean ± SEM) |               |
| Non-specific control                                                                          | 100% ± 0%                                      |                                      | 100% ± 0%                                     |               |
| SNX3 #1                                                                                       | 8.77% ± 3.12%                                  |                                      | 79.37% ± 4.38%                                |               |
| SNX3 #2                                                                                       | 26.23% ± 7.61%                                 |                                      | 95.47% ± 7.06%                                |               |
| SNX3 expression level after SNX1 knockdown (Figure S3D)                                       |                                                |                                      |                                               |               |
| siRNA target                                                                                  | Quantification SNX3 protein level (Mean ± SEM) |                                      | Corresponding SNX1 protein level (Mean ± SEM) |               |
| Non-specific control                                                                          | 100% ± 0%                                      |                                      | 100% ± 0%                                     |               |
| SNX1 #1                                                                                       | 5.23% ± 1.08%                                  |                                      | 93.30% ± 8.14%                                |               |
| SNX1 #2                                                                                       | 8.39% ± 3.51%                                  |                                      | 99.73% ± 11.14%                               |               |
| Compaction after Wortmannin treatment (Figure 3Q)                                             |                                                |                                      |                                               |               |
| Wortmannin concentration                                                                      | Morphology of internalized borreliae           |                                      | Quantification (Mean ± SEM)                   |               |
| control                                                                                       | compacted                                      |                                      | 49.90% ± 9.27%                                |               |
| 1 μM                                                                                          |                                                |                                      | 21.63% ± 2.15%                                |               |
| SNX3 accumulation at <i>Borrelia</i> phagosomes after Wortmannin treatment (Figure 3T)        |                                                |                                      |                                               |               |
| Wortmannin concentration                                                                      |                                                | Quantification (Mean ± SEM)          |                                               |               |
| control                                                                                       |                                                | 62.43% ± 5.41%                       |                                               |               |
| 1 μM                                                                                          |                                                | 2.97% ± 1.63%                        |                                               |               |
| Effect of SNX3 rescue after knockdown on the morphology of internalized borreliae (Figure 4D) |                                                |                                      |                                               |               |
| siRNA target                                                                                  | overexpression of                              | Morphology of internalized borreliae | Quantification (Mean ± SEM)                   |               |
| Non-specific control                                                                          | GFP control                                    | compacted                            | 71.27% ± 4.78%                                |               |
|                                                                                               | siRNA insensitive GFP-SNX3                     |                                      | 60.13% ± 4.83%                                |               |
|                                                                                               | siRNA insensitive GFP-SNX3-Y71A                |                                      | 47.70% ± 7.39%                                |               |

|                                                                                                                               |                                                            |                                 |                                    |
|-------------------------------------------------------------------------------------------------------------------------------|------------------------------------------------------------|---------------------------------|------------------------------------|
| SNX3 #1                                                                                                                       | GFP control                                                | compacted                       | 34.70% ± 6.35%                     |
|                                                                                                                               | siRNA insensitive GFP-SNX3                                 |                                 | 64.63% ± 2.81%                     |
|                                                                                                                               | siRNA insensitive GFP-SNX3-Y71A                            |                                 | 31.67% ± 3.35%                     |
| <b>Accumulation of GFP-labeled SNX deletion constructs at internalized borreliae (Figure 5B)</b>                              |                                                            |                                 |                                    |
| <b>Overexpression of</b>                                                                                                      | <b>Accumulation at internalized borreliae (Mean ± SEM)</b> |                                 |                                    |
| GFP-SNX3-FL                                                                                                                   | 61.67% ± 10.93%                                            |                                 |                                    |
| GFP-SNX3-ΔN                                                                                                                   | 41.67% ± 4.41%                                             |                                 |                                    |
| GFP-SNX3-PX+C                                                                                                                 | 38.33% ± 3.33%                                             |                                 |                                    |
| GFP-SNX3-ΔC                                                                                                                   | 11.67% ± 7.27%                                             |                                 |                                    |
| GFP-SNX3-N+α                                                                                                                  | 0%                                                         |                                 |                                    |
| GFP-SNX3-C                                                                                                                    | 0%                                                         |                                 |                                    |
| <b>Effect of rescue by different SNX3 constructs after knockdown on the morphology of internalized borreliae (Figure 5S1)</b> |                                                            |                                 |                                    |
| <b>siRNA target</b>                                                                                                           | <b>Morphology of internalized borreliae</b>                | <b>overexpression construct</b> | <b>Quantification (Mean ± SEM)</b> |
| Non-specific control                                                                                                          | compacted                                                  | GFP-C1                          | 67.50% ± 3.64%                     |
|                                                                                                                               |                                                            | GFP-SNX3-FL                     | 58.08% ± 0.78%                     |
|                                                                                                                               |                                                            | GFP-SNX3-ΔN                     | 64.83% ± 7.61%                     |
|                                                                                                                               |                                                            | GFP-SNX3-PX+C                   | 62.50% ± 7.51%                     |
|                                                                                                                               |                                                            | GFP-SNX3-ΔC                     | 37.28% ± 6.12%                     |
|                                                                                                                               |                                                            | GFP-SNX3-N+α                    | 41.9% ± 4.33%                      |
|                                                                                                                               |                                                            | GFP-SNX3-C                      | 42.85% ± 4.01%                     |
| SNX3                                                                                                                          | compacted                                                  | GFP-C1                          | 34.03% ± 2.85%                     |
|                                                                                                                               |                                                            | GFP-SNX3-FL                     | 68.23% ± 1.76%                     |
|                                                                                                                               |                                                            | GFP-SNX3-ΔN                     | 55.23% ± 6.65%                     |
|                                                                                                                               |                                                            | GFP-SNX3-PX+C                   | 56.48% ± 6.98%                     |
|                                                                                                                               |                                                            | GFP-SNX3-ΔC                     | 41.45% ± 6.55%                     |
|                                                                                                                               |                                                            | GFP-SNX3-N+α                    | 36.48% ± 5.70%                     |
|                                                                                                                               |                                                            | GFP-SNX3-C                      | 40.65% ± 3.72%                     |
| <b>Effect of double knockdown of SNX1 and SNX3 on the morphology of internalized borreliae (Figure 6I)</b>                    |                                                            |                                 |                                    |
| <b>siRNA target</b>                                                                                                           | <b>Morphology of internalized borreliae</b>                |                                 | <b>Quantification (Mean ± SEM)</b> |
| Non-specific control                                                                                                          | compacted                                                  |                                 | 70.20% ± 5.06%                     |

|                                                                                                                              |                                             |                                 |                                    |
|------------------------------------------------------------------------------------------------------------------------------|---------------------------------------------|---------------------------------|------------------------------------|
| SNX3 #1                                                                                                                      |                                             | 35.67% ± 2.04%                  |                                    |
| Gal9 #1                                                                                                                      |                                             | 39.03% ± 2.84%                  |                                    |
| SNX3 #1 + Gal9 #1                                                                                                            |                                             | 39.23% ± 9.37%                  |                                    |
| <b>Fluorescence intensity of DQ-BSA/borreliae phagosomes after Gal9 siRNA treatment (Figure 7G)</b>                          |                                             |                                 |                                    |
| <b>siRNA target</b>                                                                                                          | <b>Quantification (Mean ± SEM)</b>          |                                 |                                    |
| Non-specific control                                                                                                         | 1311 a.u. ± 51.96 a.u.                      |                                 |                                    |
| Gal9 #1                                                                                                                      | 1074 a.u. ± 60.87 a.u.                      |                                 |                                    |
| Gal9 #2                                                                                                                      | 1048 a.u. ± 57.07 a.u.                      |                                 |                                    |
| <b>Fluorescence intensity of DQ-BSA after Gal9 siRNA treatment (Figure 7H)</b>                                               |                                             |                                 |                                    |
| <b>siRNA target</b>                                                                                                          | <b>Quantification (Mean ± SEM)</b>          |                                 |                                    |
| Non-specific control                                                                                                         | 1525 a.u. ± 17.18 a.u.                      |                                 |                                    |
| Gal9 #1                                                                                                                      | 1591 a.u. ± 21.37 a.u.                      |                                 |                                    |
| Gal9 #2                                                                                                                      | 1590 a.u. ± 33.30 a.u.                      |                                 |                                    |
| <b>Effect of rescue by different Gal9 constructs after knockdown on the morphology of internalized borreliae (Figure 8B)</b> |                                             |                                 |                                    |
| <b>siRNA target</b>                                                                                                          | <b>Morphology of internalized borreliae</b> | <b>Overexpression construct</b> | <b>Quantification (Mean ± SEM)</b> |
| Non-specific control                                                                                                         | Compacted                                   | GFP-C1                          | 54.32% ± 2.80%                     |
|                                                                                                                              |                                             | GFP-Gal9-FL                     | 54.69% ± 3.12%                     |
|                                                                                                                              |                                             | GFP-Gal9-ΔCRD2                  | 44.40% ± 5.02%                     |
|                                                                                                                              |                                             | GFP-Gal9-ΔN                     | 52.19% ± 5.54%                     |
|                                                                                                                              |                                             | GFP-Gal9-linker+CRD2            | 53.28% ± 5.03%                     |
|                                                                                                                              |                                             | GFP-Gal9-N+CRD1                 | 41.13% ± 8.34%                     |
|                                                                                                                              |                                             | GFP-Gal9-CRD1+linker            | 51.57% ± 8.91%                     |
| Gal9                                                                                                                         | Compacted                                   | GFP-C1                          | 36.56% ± 1.62%                     |
|                                                                                                                              |                                             | GFP-Gal9-FL                     | 56.17% ± 3.08%                     |
|                                                                                                                              |                                             | GFP-Gal9-ΔCRD2                  | 43.84% ± 1.30%                     |
|                                                                                                                              |                                             | GFP-Gal9-ΔN                     | 56.57% ± 5.00%                     |
|                                                                                                                              |                                             | GFP-Gal9-linker+CRD2            | 35.24% ± 3.66%                     |
|                                                                                                                              |                                             | GFP-Gal9-N+CRD1                 | 35.78% ± 4.64%                     |
|                                                                                                                              |                                             | GFP-Gal9-CRD1+linker            | 41.89% ± 4.60%                     |

| <b>Effect of rescue by different Gal9 CRD mutants after knockdown on the morphology of internalized borreliae (Figure 8D)</b> |                                                    |                                                                    |                                    |
|-------------------------------------------------------------------------------------------------------------------------------|----------------------------------------------------|--------------------------------------------------------------------|------------------------------------|
| <b>siRNA target</b>                                                                                                           | <b>Morphology of internalized borreliae</b>        | <b>Overexpression construct</b>                                    | <b>Quantification (Mean ± SEM)</b> |
| Non-specific control                                                                                                          | Compacted                                          | GFP-C1                                                             | 58.52% ± 3.98%                     |
| Gal9                                                                                                                          | Compacted                                          | GFP-C1                                                             | 40.46% ± 0.46%                     |
|                                                                                                                               |                                                    | GFP-Gal9-FL                                                        | 59.32% ± 4.32%                     |
|                                                                                                                               |                                                    | GFP-Gal9-A46V                                                      | 51.08% ± 3.46%                     |
|                                                                                                                               |                                                    | GFP-Gal9-N137A                                                     | 53.36% ± 5.74%                     |
|                                                                                                                               |                                                    | GFP-Gal9-R252A                                                     | 50.00% ± 4.55%                     |
|                                                                                                                               |                                                    | GFP-Gal9-A46V+N137A                                                | 57.81% ± 1.29%                     |
| <b>Effect of SNX3 knockdown on Rab5a and galectin-9 fluorescence intensity at borreliae phagosomes (Figure 9C+D)</b>          |                                                    |                                                                    |                                    |
| <b>Protein</b>                                                                                                                | <b>siRNA target</b>                                | <b>Fluorescence intensity at borreliae phagosomes (Mean ± SEM)</b> |                                    |
| Rab5a                                                                                                                         | Control                                            | 38078 a.u. ± 5603 a.u.                                             |                                    |
|                                                                                                                               | SNX3                                               | 17497 a.u. ± 2468 a.u.                                             |                                    |
| Galectin-9                                                                                                                    | Control                                            | 2837 a.u. ± 291.2 a.u.                                             |                                    |
|                                                                                                                               | SNX3                                               | 1685 a.u. ± 144.5 a.u.                                             |                                    |
| <b>Effect of SNX3 knockdown on phagosomes size (Figure 9E)</b>                                                                |                                                    |                                                                    |                                    |
| <b>siRNA target</b>                                                                                                           | <b>Volume of borreliae phagosomes (Mean ± SEM)</b> |                                                                    |                                    |
| control                                                                                                                       | 2.80 ± 0.31 μm <sup>3</sup>                        |                                                                    |                                    |
| SNX3                                                                                                                          | 2.65 ± 0.25 μm <sup>3</sup>                        |                                                                    |                                    |

**Table S2. siRNAs, oligonucleotides, plasmids, and antibodies used in this study**

| siRNAs      |                              |
|-------------|------------------------------|
| Name/target | Sequence (5' → 3')           |
| SNX3 #1     | GCGUCAGCUUCCUUUUAGA-(dTdT)   |
| SNX3 #2     | CUCAUAUGCUCAGUUUUGU-(dTdT)   |
| SNX1 #1     | AAGAACAAGACCAAGAGCCAC-(dTdT) |
| SNX1 #2     | GAACAAGACCAAGAGCCAC-(dTdT)   |
| Gal9 #1     | GGACUUCAGAUCACUGU-(dTdT)     |
| Gal9 #2     | GGAAGACACACAUGCCUUUCC-(dTdT) |

| Oligonucleotides |                    |                                            |                  |
|------------------|--------------------|--------------------------------------------|------------------|
| #                | Name               | Sequence (5' → 3')                         | Restriction site |
| P01              | SNX3_fw            | AAAAAAGGTACCCCGCGGAGACCGTGGCTGACACCC       | KpnI             |
| P02              | SNX3_ΔC_rev        | TTTTTTGGATCCTCAATCTATTATTTTCATCTTGTA AAAAC | BamHI            |
| P03              | SNX3_N+α_rev       | TTTTTTTTGGATCCTCAGCTGGGGGGTCCGTAGG         | BamHI            |
| P04              | SNX3_ΔN_fw         | AAAAAAGGTACCCCAACCTGAATGACGCCTACGGACCC     | KpnI             |
| P05              | SNX3_rev           | TTTTTTGGATCCTCAGGCATGTCTTATTTTAGATGG       | BamHI            |
| P06              | SNX3_PX+C_fw       | AAAAAAGGTACCCCAACTTCCTCGAGATCGATGTGAGC     | KpnI             |
| P07              | SNX3_C_fw          | AAAAAAGGTACCCCAAAGCTATACTCCATCT            | KpnI             |
| P08              | SNX3_C_rev         | TTTTTTGGATCCTCAGGCATGTCTTATTTT             | BamHI            |
| P09              | Gal9_fw            | AAAAAACTCGAGCCGCCTTCAGCGTTCCAGGCTCCCTAC    | XhoI             |
| P10              | Gal9_rev           | TTTTTTGGTACCTCATGTCTGCACATGGGTCAGCTGGATGTC | KpnI             |
| P11              | SNX3_PX_fw         | GAAAGAATCTACTGTTAGAAGAAGAGCCAGTGACTTTG     | -                |
| P12              | SNX3_PX_rev        | CAAAGTCACTGGCTCTTCTTCTAACAGTAGATTCTTTC     | -                |
| P13              | SNX3_si-insens_fw  | GAAAGCGTTTTTTCGCGCAGCTTCCATTTCAGAGGAGATG   | -                |
| P14              | SNX3_si-insens_rev | CATCTCCTCTGAATGGAAGCTGCCGAAAAACGCTTTC      | -                |
| P15              | SNX3_GST_fw        | AAAAAAGGATCCCGCGGAGACCGTGGCTGACACCC        | BamHI            |
| P16              | SNX3_GST_rev       | AAAAAAGAATTCTCAGGCATGTCTTATTTTAGATGG       | EcoRI            |
| P17              | KIF5A_stop_fw      | CGGCATGGACGAGCTGTACAAGTGATCCATGAATGGAGC    | -                |
| P18              | KIF5A_stop_rev     | GCTCCATTCATGGATCACTTGTACAGCTCGTCCATGCCG    | -                |

|     |                    |                                       |      |
|-----|--------------------|---------------------------------------|------|
| P19 | Gal9_CRD1_fw       | AAAAAACTCGAGCCTTTTCTGGGACTATTCAAGGAGG | XhoI |
| P20 | Gal9_CRD1_rev      | TTTTTTGGTACCTCAGAAGCTGATGTAGGACAGCTGC | KpnI |
| P21 | Gal9_linker_fw     | AAAAAACTCGAGCCCAGAACCCCCGCACAG        | XhoI |
| P22 | Gal9_linker_rev    | TTTTTTGGTACCTCAAGGCATCGGATAGGCGGG     | KpnI |
| P23 | Gal9_si-insens_fw  | CAGGACGGACTACAAATAACAGTCAATGGGACC     | -    |
| P24 | Gal9_si-insens_rev | GGTCCCATTGACTGTTATTTGTAGTCCGTCCTG     | -    |
| P25 | Gal9_A46V_fw       | GGAACCAGGTTTGTGTGAACCTTCAGACTGG       | -    |
| P26 | Gal9_A46V_rev      | AAAGTTCACAACAAACCTGGTCCACTGGCAGC      | -    |
| P27 | Gal9_N137A_fw      | ATCTCCGTCGCTGGCTCTGTGCAGCTGTCCTA      | -    |
| P28 | Gal9_N137A_rev     | TGCACAGAGCCAGCGACGGAGATGGTGTCCAC      | -    |
| P29 | Gal9_R252A_fw      | CAGTGCTCAGGCGTCCACATCAACCTGTGCT       | -    |
| P30 | Gal9_R252A_rev     | TTGATGTGGAACGCCTGAGCACTGGGCAGGAC      | -    |

| <b>Antibodies and staining reagents</b> |                   |                   |                    |                    |
|-----------------------------------------|-------------------|-------------------|--------------------|--------------------|
| <b>Antibody</b>                         | <b>Company</b>    | <b>Species</b>    | <b>Dilution IF</b> | <b>Dilution WB</b> |
| anti-SNX3 (C16)                         | Santa Cruz        | goat polyclonal   | 1/100              | -                  |
| anti-SNX3                               | Proteintech       | rabbit polyclonal | 1/200              | 1/200              |
| anti-SNX1                               | BD Biosciences    | mouse monoclonal  | 1/100              | 1/1000             |
| anti-Gal9                               | Proteintech       | rabbit polyclonal | 1/200              | 1/500              |
| anti- <i>Borrelia burgdorferi</i>       | Antibodies online | rabbit polyclonal | 1/1000             | 1/1000             |
| anti- <i>Borrelia burgdorferi</i> Bss42 | Novus Biologicals | mouse monoclonal  | 1/1000             | 1/1000             |
| anti-GFP                                | Novus Biologicals | rabbit polyclonal | -                  | 1/5000             |
| anti-pan-actin                          | Merck Millipore   | mouse monoclonal  | -                  | 1/5000             |
| anti-mouse-HRP                          | GE Healthcare     | sheep polyclonal  | -                  | 1/5000             |
| anti-rabbit-HRP                         | GE Healthcare     | donkey polyclonal | -                  | 1/5000             |
| anti-goat-HRP                           | abcam             | rabbit polyclonal | -                  | 1/5000             |
| anti-rabbit-AlexaFluor488/568/647       | Thermo Scientific | donkey or goat    | 1/200              | -                  |
| anti-mouse-AlexaFluor488/568/647        | Thermo Scientific | donkey or goat    | 1/200              | -                  |
| anti-goat-AlexaFluor488/568/647         | Thermo Scientific | donkey            | 1/200              | -                  |

| Phalloidin<br>AlexaFluor488/568/647 | Thermo<br>Scientific           | -                                                                | 1/50 | - |
|-------------------------------------|--------------------------------|------------------------------------------------------------------|------|---|
| Plasmids                            |                                |                                                                  |      |   |
| Name                                | Provided by/<br>purchased from | Reference                                                        |      |   |
| GFP-SNX3                            | S. Grinstein                   | Braun et al, Cell Microbiol. 2010 Sep 1;12(9):1352-67            |      |   |
| RFP-SNX3                            | J. Gruenberg                   | Pons et al, PLoS Biol. 2008 Sep 2;6(9):e214                      |      |   |
| Rab5a-RFP                           | S. Grinstein                   |                                                                  |      |   |
| SNX1-GFP                            | S. Grinstein                   |                                                                  |      |   |
| SNX4-GFP                            | L. Binkle                      |                                                                  |      |   |
| GFP-SNX8                            | K. Sandvig                     | Dyve et al, Biochem Biophys Res Commun. 2009 Dec 4;390(1):109-14 |      |   |
| mCherry-SNX9                        | V. Haucke                      | Posor et al, Nature. 2013 Jul 11;499(7457):233-7                 |      |   |
| GFP-SNX12                           | J. Gruenberg                   | Pons et al, PLoS One. 2012;7(6):e38949                           |      |   |
| SNX17-GFP                           | R. Boettcher                   | Böttcher et al, Nat Cell Biol. 2012 May 6;14(6):584-92           |      |   |
| SNX27-GFP                           | R. Boettcher                   | Tseng et al, J Mol Biol. 2014 Sep 9;426(18):3180-3194            |      |   |
| SNX31-GFP                           | R. Boettcher                   | Tseng et al, J Mol Biol. 2014 Sep 9;426(18):3180-3194            |      |   |
| PX-p40phox-GFP                      | Addgene #19010                 | Derived from Addgene, desposited by M. Yaffe                     |      |   |
| PHD-Ing2x3-GFP                      | Addgene #21589                 | Derived from Addgene, desposited by J. Yuan                      |      |   |
| MLNx2-GFP                           | T. Balla                       | Hammond et al, PLoS One. 2015 Oct 13;10(10):e0139957             |      |   |
| P4M-SidM-GFP                        | T. Balla                       | Hammond et al, J Cell Biol. 2014 Apr 14;205(1):113-26            |      |   |
| TAPP1-PH-GFP                        | T. Balla                       | Kimber et al, Biochem J. 2002 Feb 1;361(Pt 3):525-36             |      |   |
| PH-PLCδ1-GFP                        | T. Balla                       | Várnai & Balla, J Cell Biol. 1998 Oct 19;143(2):501-10.          |      |   |
| PH-AKT-GFP                          | T. Balla                       | Sason et al, Mol Biol Cell. 2009 Jan;20(1):544-55                |      |   |
| EGFP-C1                             | Clontech                       |                                                                  |      |   |
| EGFP-C2                             | Clontech                       |                                                                  |      |   |
| pGEX-2T                             | GE Healthcare                  |                                                                  |      |   |
| GFP-SNX3 siRNA-insensitive          |                                | This work                                                        |      |   |
| GFP-SNX3-Y71A                       |                                | This work                                                        |      |   |
| GFP-SNX3-Y71A siRNA-insensitive     |                                | This work                                                        |      |   |
| GST-SNX3                            |                                | This work                                                        |      |   |



|                                        |                 |                                                             |
|----------------------------------------|-----------------|-------------------------------------------------------------|
| GST-SNX3-Y71A                          |                 | This work                                                   |
| GFP-SNX3-ΔN                            |                 | This work                                                   |
| GFP-SNX3-PX+C                          |                 | This work                                                   |
| GFP-SNX3-N+α                           |                 | This work                                                   |
| GFP-SNX3-ΔC                            |                 | This work                                                   |
| GFP-SNX3-C                             |                 | This work                                                   |
| GFP-SNX3-ΔN siRNA-insensitive          |                 | This work                                                   |
| GFP-SNX3-PX+C siRNA-insensitive        |                 | This work                                                   |
| GFP-SNX3-ΔC siRNA-insensitive          |                 | This work                                                   |
| GFP-Gal9                               |                 | This work                                                   |
| KIF5A-GFP-CIBN                         | Addgene #102252 | Derived from Addgene, deposited by B. Cui                   |
| KIF5A-GFP                              |                 | This work                                                   |
| Myo1e-GFP                              | M. Krendel      | Ouderkirk & Krendel, Exp Cell Res. 2014 Apr 1;322(2):265-76 |
| GFP-Rab35                              | A. Echard       | Klinkert & Echard, Traffic. 2016 Oct;17(10):1063-77         |
| GFP-Gal9-ΔCRD2                         |                 | This work                                                   |
| GFP-Gal9-ΔN                            |                 | This work                                                   |
| GFP-Gal9-linker+CRD2                   |                 | This work                                                   |
| GFP-Gal9-N+CRD1                        |                 | This work                                                   |
| GFP-Gal9-CRD1+linker                   |                 | This work                                                   |
| GFP-Gal9-ΔCRD2 siRNA-insensitive       |                 | This work                                                   |
| GFP-Gal9-ΔN siRNA-insensitive          |                 | This work                                                   |
| GFP-Gal9-N+CRD1 siRNA-insensitive      |                 | This work                                                   |
| GFP-Gal9-CRD1+linker siRNA-insensitive |                 | This work                                                   |
| GFP-Gal9-A46V siRNA-insensitive        |                 | This work                                                   |
| GFP-Gal9-N137A siRNA-insensitive       |                 | This work                                                   |
| GFP-Gal9-R252A siRNA-insensitive       |                 | This work                                                   |
| GFP-Gal9-A46V+N137A siRNA-insensitive  |                 | This work                                                   |
| flotillin-1-mCherry                    | A. Echard       | Baumann et al., J Biol Chem 2012 Nov;287(47): 39664-72      |

|                     |                  |                                                           |
|---------------------|------------------|-----------------------------------------------------------|
| flotillin-2-mCherry | A. Echard        | Baumann et al., J Biol Chem 2012<br>Nov;287(47): 39664-72 |
| GFP-Rab6a           | J. Kremerskothen | Rzomb et al., Infect Immun. 2003<br>Oct;71(10):5855-70    |
| GFP-Rab8a           | D. Sheff         | Henry & Sheff, Mol Biol Cell 2008<br>May;19(5):2059-68    |
| GFP-Rab10           | K. Simons        | Schucke et el., Traffic 2007 Jan;8(1): Epub<br>2006       |
| GFP-Rab18           | Addgene #49550   | Derived from Addgene, deposited by M.<br>Scidmore         |
| GFP-Rab21a          | A.T. Jones       | Simpson et al., J Cell Sci 2004<br>Sept;117:6297-6311     |
| GFP-SNAP23          | M. Coppelino     | Williams et al., Mol Biol Cell 2014<br>Jul;25(13):2061-70 |
